# Supplementary material for: Assessment of the Effects of Dietary Vitamin D Levels on Olanzapine-Induced Metabolic Side Effects: Focus on the Endocannabinoidome-Gut Microbiome Axis
Source: MDPI journal article supplement (doi:10.3390/ijms222212361), 2021-11-16

Supplemental Table S1: Diet composition

| Diet                                  | LFLS                 |             |                      |             |                     |             | HFHS                 |             |                      |             |                     |             |
|---------------------------------------|----------------------|-------------|----------------------|-------------|---------------------|-------------|----------------------|-------------|----------------------|-------------|---------------------|-------------|
|                                       | VDC                  |             | VDD                  |             | VDS                 |             | VDC                  |             | VDD                  |             | VDS                 |             |
|                                       | [1.0 IU/g Vitamin D] |             | [0.1 IU/g Vitamin D] |             | [10 IU/g Vitamin D] |             | [1.0 IU/g Vitamin D] |             | [0.1 IU/g Vitamin D] |             | [10 IU/g Vitamin D] |             |
|                                       | gm(%)                | kcal(%)     | gm(%)                | kcal(%)     | gm(%)               | kcal(%)     | gm(%)                | kcal(%)     | gm(%)                | kcal(%)     | gm(%)               | kcal(%)     |
| Protein                               | 19                   | 20          | 19                   | 20          | 19                  | 20          | 24                   | 20          | 24                   | 20          | 24                  | 20          |
| Carbohydrate                          | 67                   | 70          | 66                   | 69          | 67                  | 70          | 41                   | 35          | 40                   | 34          | 41                  | 35          |
| Fat                                   | 2                    | 10          | 2                    | 10          | 2                   | 10          | 3                    | 45          | 3                    | 45          | 3                   | 45          |
| <b>Total</b>                          |                      | <b>100</b>  |                      | <b>99</b>   |                     | <b>100</b>  |                      | <b>100</b>  |                      | <b>99</b>   |                     | <b>100</b>  |
| <b>kcal/gm</b>                        | <b>3.85</b>          |             | <b>3.85</b>          |             | <b>3.84</b>         |             | <b>4.73</b>          |             | <b>4.73</b>          |             |                     |             |
| <b>Ingredient</b>                     | <b>gm</b>            | <b>kcal</b> | <b>gm</b>            | <b>kcal</b> | <b>gm</b>           | <b>kcal</b> | <b>gm</b>            | <b>kcal</b> | <b>gm</b>            | <b>kcal</b> | <b>gm</b>           | <b>kcal</b> |
| Casein, 80 Mesh                       | 200                  | 800         | 200                  | 800         | 200                 | 800         | 200                  | 800         | 200                  | 800         | 200                 | 800         |
| L-Cystine                             | 3                    | 12          | 3                    | 12          | 3                   | 12          | 3                    | 12          | 3                    | 12          | 3                   | 12          |
| Corn Starch                           | 506.2                | 2025        | 506.2                | 2025        | 506.2               | 2025        | 72.8                 | 291         | 72.8                 | 291         | 72.8                | 291         |
| Maltodextrin 10                       | 125                  | 500         | 125                  | 500         | 125                 | 500         | 100                  | 400         | 100                  | 400         | 100                 | 400         |
| Sucrose                               | 68.8                 | 275         | 68.8                 | 275         | 68.8                | 275         | 172.8                | 691         | 172.8                | 691         | 172.8               | 691         |
| Cellulose, BW200                      | 50                   | 0           | 50                   | 0           | 50                  | 0           | 50                   | 0           | 50                   | 0           | 50                  | 0           |
| Soybean Oil                           | 25                   | 225         | 25                   | 225         | 25                  | 225         | 25                   | 225         | 25                   | 225         | 25                  | 225         |
| Lard                                  | 0                    | 0           | 0                    | 0           | 0                   | 0           | 0                    | 0           | 0                    | 0           | 0                   | 0           |
| Palm Oil                              | 20                   | 180         | 20                   | 180         | 20                  | 180         | 177.5                | 1598        | 177.5                | 1598        | 177.5               | 1598        |
| Mineral Mix S10026                    | 10                   | 0           | 10                   | 0           | 10                  | 0           | 10                   | 0           | 10                   | 0           | 10                  | 0           |
| DiCalcium Phosphate                   | 13                   | 0           | 13                   | 0           | 13                  | 0           | 13                   | 0           | 13                   | 0           | 13                  | 0           |
| Calcium Carbonate                     | 5.5                  | 0           | 5.5                  | 0           | 5.5                 | 0           | 5.5                  | 0           | 5.5                  | 0           | 5.5                 | 0           |
| Potassium Citrate, 1 H <sub>2</sub> O | 16.5                 | 0           | 16.5                 | 0           | 16.5                | 0           | 16.5                 | 0           | 16.5                 | 0           | 16.5                | 0           |
| Vitamin Mix V10001                    | 10                   | 40          | 0                    | 0           | 10                  | 40          | 10                   | 40          | 0                    | 0           | 10                  | 40          |
| Vitamin Mix V13201 (w/o Vit D)        | 0                    | 0           | 10                   | 40          | 0                   | 0           | 0                    | 0           | 10                   | 40          | 0                   | 0           |
| Vitamin D, 100,000 IU/gm              | 0                    | 0           | 0                    | 0           | 0.095               | 0           | 0.0004               | 0           | 0                    | 0           | 0.0993              | 0           |
| Choline Bitartrate                    | 0                    | 0           | 2                    | 0           | 2                   | 0           | 2                    | 0           | 2                    | 0           | 2                   | 0           |
| <b>Total</b>                          | <b>1055.05</b>       | <b>4057</b> | <b>1055.05</b>       | <b>4057</b> | <b>1055.15</b>      | <b>4057</b> | <b>858.15</b>        | <b>4057</b> | <b>858.15</b>        | <b>4057</b> | <b>858.24</b>       | <b>4057</b> |
| Vitamin D (IU/4057 kcal)              | 1060                 |             | 60                   |             | 10560               |             | 1100                 |             | 60                   |             | 10990               |             |
| Vitamin D (IU/g diet)*                | 1                    |             | 0.06                 |             | 10.01               |             | 1.28                 |             | 0.07                 |             | 12.81               |             |

gr(%); % of macronutrient by weight of diet

kcal(%); % of macronutrient contribution by kcal of diet

FigureS1: Body composition

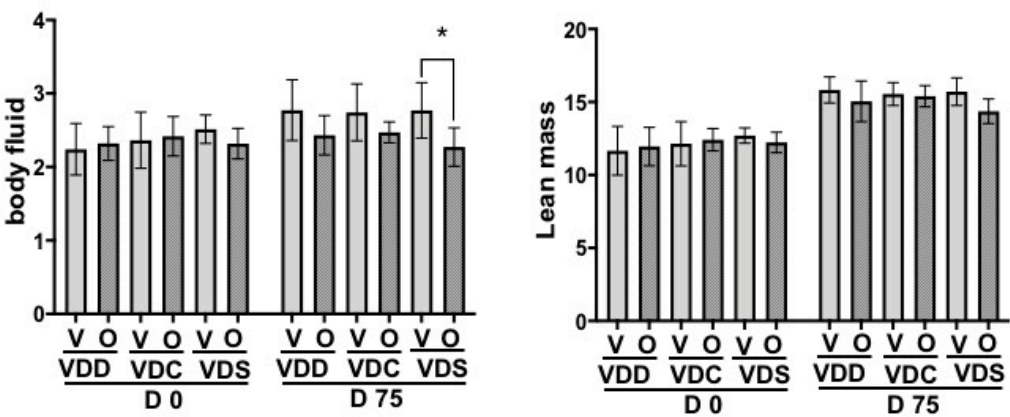

FigureS2: Relative expression of eCBome genes as compared to VDC-V; Blue boxes shows the significant difference between olanzapine and vehicle in each vitamin D level; \* shows significance ( $p < 0.05$ ) between different Vitamin D levels, # shows significance ( $p < 0.05$ ) under the effect of both Vitamin D and Olanzapine.

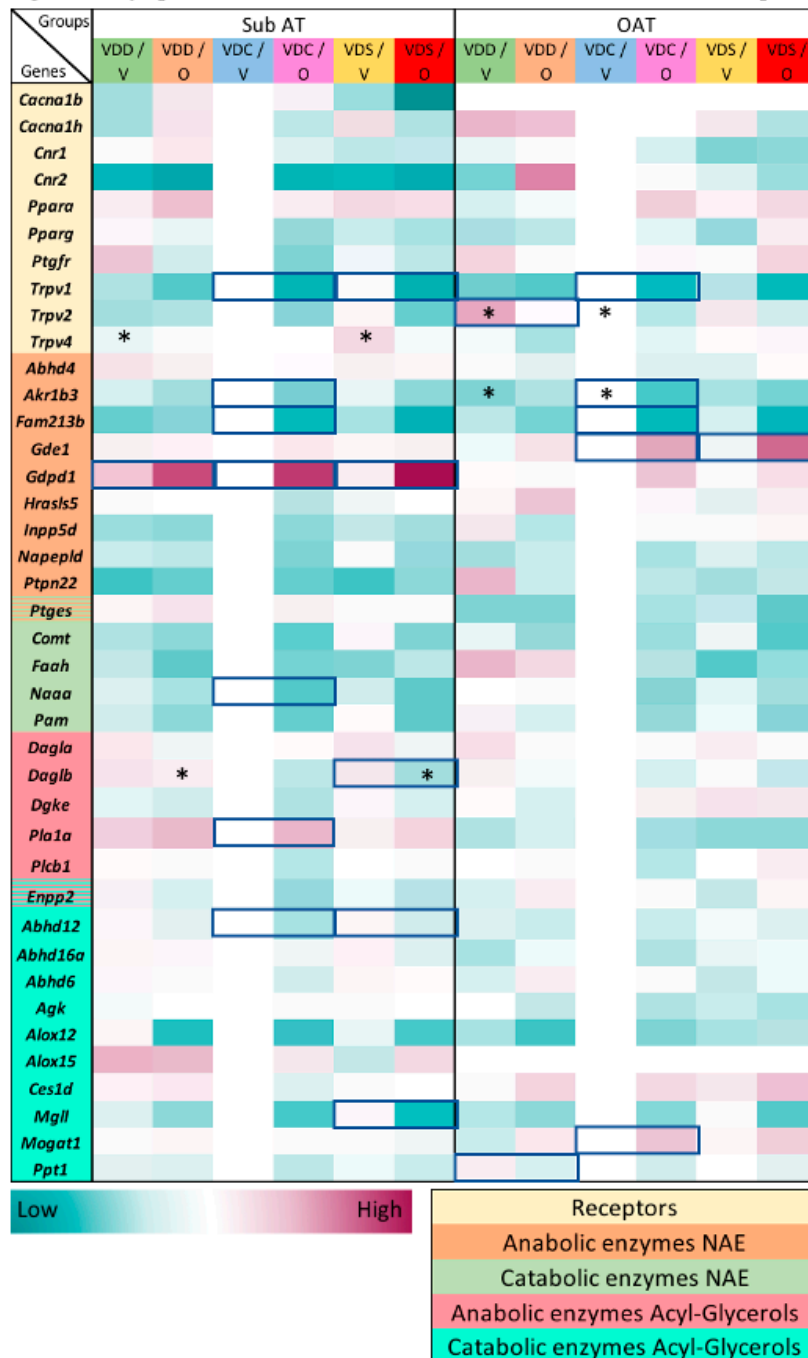

FigureS3: quantification of eCBome mediator levels; Blue boxes show the significant difference between olanzapine and vehicle in each vitamin D level; \* shows significancy (p<0.05) between different Vitamin D levels.

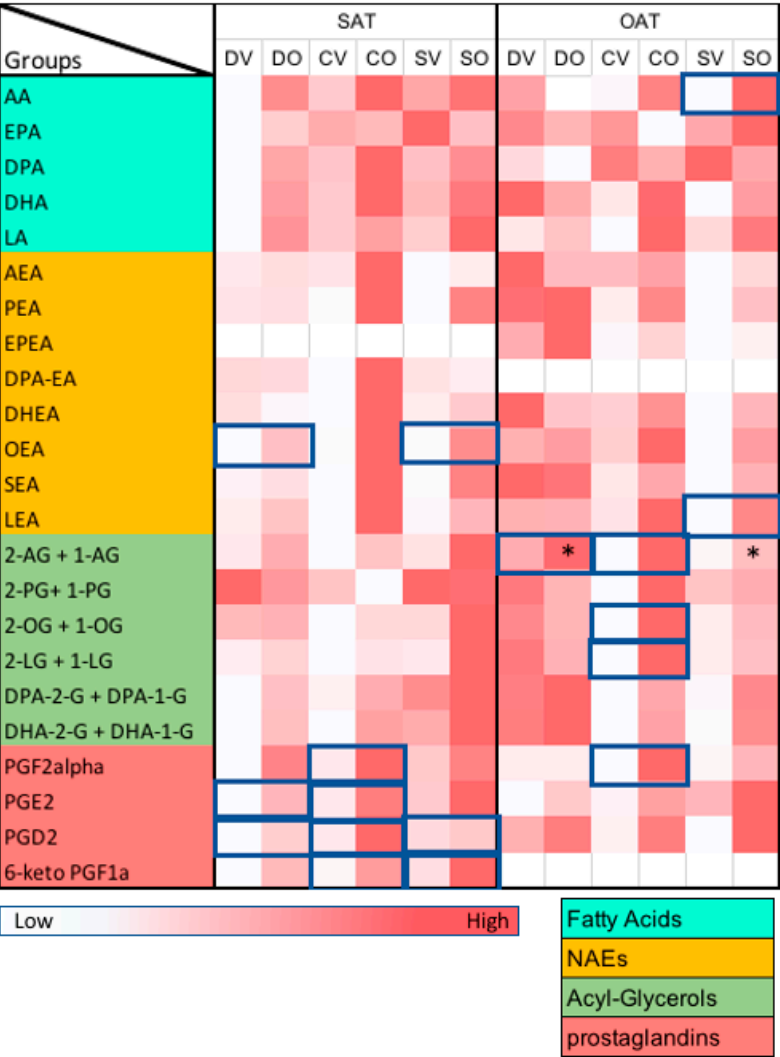

FigureS4: Gut microbiomes composition determined by PCoA coupled with PERMANOVA and differential abundance analysis

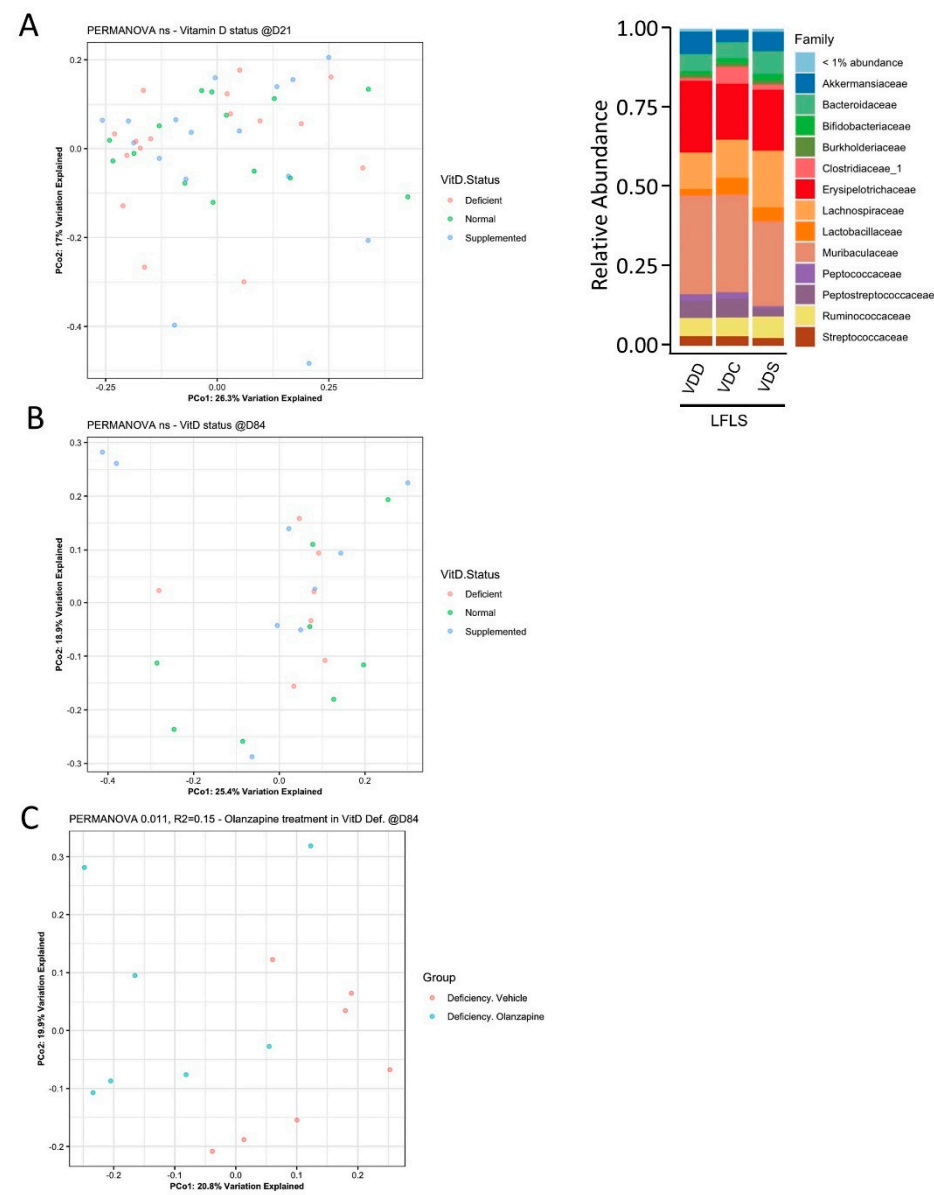

FigureS5: Relative abundance of bacterial taxa in after 3 weeks of LFLS VDD, VDC and VDS diets

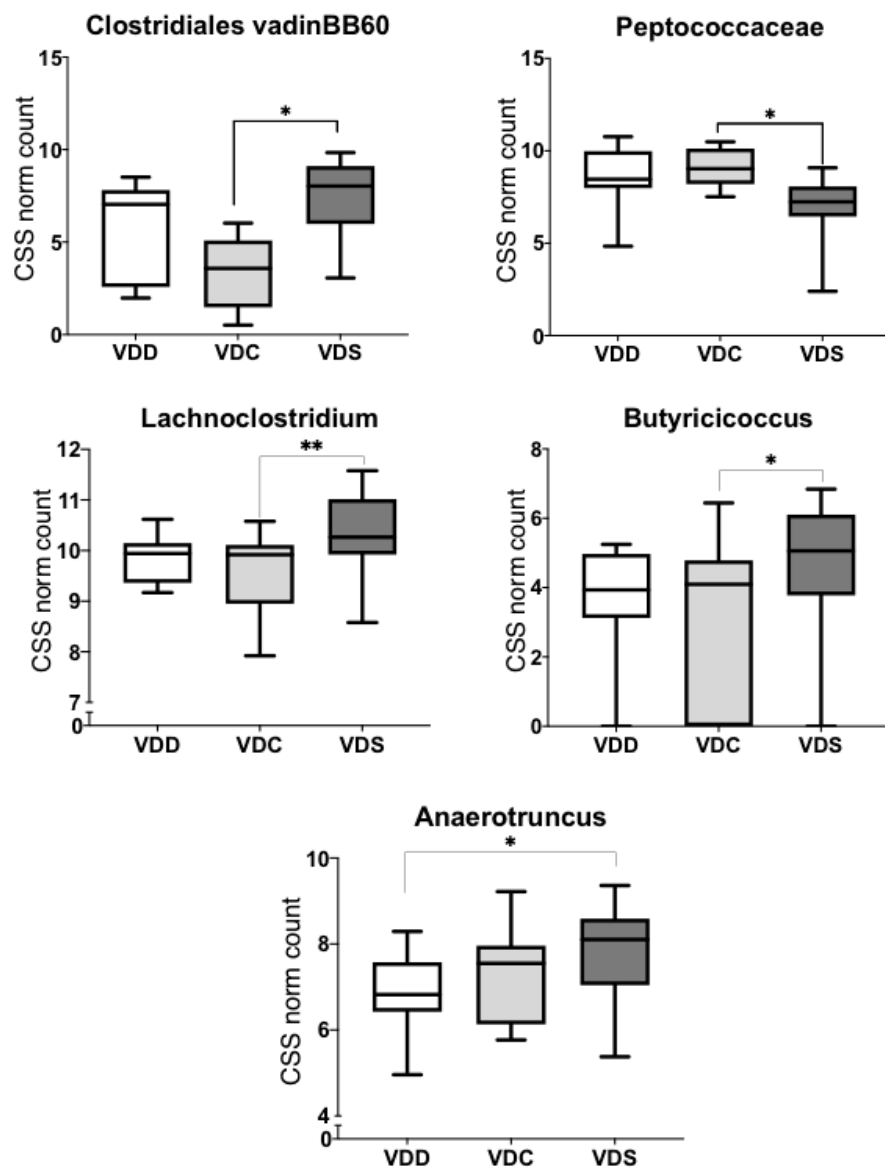

Supplement: s1 [file s1]
